# Supplementary material for: Effect of Fermented Matrix on the Color and Stability of Strawberry and Blueberry Anthocyanins during the Storage of Fruit Yogurts and Soy-Based and Bean-Based Fruit Yogurt Alternatives
Source: MDPI journal article supplement (doi:10.3390/molecules28176222), 2023-08-24

Table S1. Physicochemical composition of strawberry and blueberry preparations\*.

| Parameters                        |    | Strawberry preparation    | Blueberry preparation      |
|-----------------------------------|----|---------------------------|----------------------------|
| Soluble solids [°Brix]            |    | 38.4 <sup>a</sup> ± 0.5   | 38.9 <sup>a</sup> ± 0.8    |
| Titrateable acidity [g/100 g]     |    | 0.68 <sup>a</sup> ± 0.08  | 0.70 <sup>a</sup> ± 0.05   |
| pH                                |    | 3.52 <sup>b</sup> ± 0.01  | 3.62 <sup>a</sup> ± 0.02   |
| Colorimetric parameters           | L* | 29.4 <sup>a</sup> ± 0.9   | 24.7 <sup>b</sup> ± 1.2    |
|                                   | a* | 8.1 <sup>b</sup> ± 0.6    | 10.9 <sup>a</sup> ± 0.7    |
|                                   | b* | 2.2 <sup>b</sup> ± 0.3    | 0.4 <sup>a</sup> ± 0.3     |
| Fructose [g/100 g]                |    | 8.4 <sup>b</sup> ± 0.5    | 12.0 <sup>a</sup> ± 1.1    |
| Glucose [g/100 g]                 |    | 8.1 <sup>b</sup> ± 0.8    | 11.5 <sup>a</sup> ± 0.9    |
| Sucrose [g/100 g]                 |    | 20.7 <sup>a</sup> ± 1.5   | 13.8 <sup>b</sup> ± 0.8    |
| Citric acid [g/100 g]             |    | 0.51 <sup>b</sup> ± 0.08  | 0.68 <sup>a</sup> ± 0.07   |
| Malic acid [g/100 g]              |    | 0.143 <sup>a</sup> ± 0.02 | 0.012 <sup>b</sup> ± 0.002 |
| L-ascorbic acid [mg/100 g]        |    | 19.5 <sup>a</sup> ± 1.2   | 1.5 <sup>b</sup> ± 0.2     |
| L-dehydroascorbic acid [mg/100 g] |    | 3.1 <sup>a</sup> ± 0.1    | 1.2 <sup>b</sup> ± 0.04    |
| Phenolic content [mg/100 g]       |    | 116.4 <sup>b</sup> ± 2.8  | 157.0 <sup>a</sup> ± 3.3   |

\* Data are expressed as mean ± standard deviation, <sup>a-b</sup> - means in the same row followed by different lowercase represent the significant difference ( $p \leq 0.05$ )

Table S2. Physicochemical properties of yogurts and plant-based yogurt alternatives\*.

| Parameters              |    | Yogurts                  | Soy-based yogurt alternatives | White bean-based yogurt alternatives | Black bean-based yogurt alternatives |
|-------------------------|----|--------------------------|-------------------------------|--------------------------------------|--------------------------------------|
| pH                      |    | 4.41 <sup>a</sup> ± 0.6  | 4.55 <sup>a</sup> ± 0.7       | 4.57 <sup>a</sup> ± 0.5              | 4.46 <sup>a</sup> ± 0.8              |
| Colorimetric parameters | L* | 90.3 <sup>a</sup> ± 1.8  | 83.6 <sup>b</sup> ± 2.4       | 61.3 <sup>c</sup> ± 1.9              | 43.4 <sup>d</sup> ± 1.0              |
|                         | a* | 0.7 <sup>c</sup> ± 0.1   | -0.12 <sup>d</sup> ± 0.02     | 2.9 <sup>b</sup> ± 0.3               | 7.4 <sup>a</sup> ± 0.5               |
|                         | b* | 10.9 <sup>b</sup> ± 0.7  | 11.6 <sup>b</sup> ± 1.2       | 16.8 <sup>a</sup> ± 1.4              | 4.9 <sup>c</sup> ± 0.5               |
| Glucose [g/100 g]       |    | 0.31 <sup>a</sup> ± 0.02 | 0.03 <sup>b</sup> ± 0.004     | 0.02 <sup>b</sup> ± 0.003            | 0.02 <sup>b</sup> ± 0.001            |
| Sucrose [g/100 g]       |    | nd                       | 0.27 <sup>a</sup> ± 0.01      | 0.13 <sup>b</sup> ± 0.01             | 0.09 <sup>c</sup> ± 0.004            |
| Lactose [g/100 g]       |    | 2.76 ± 0.16              | nd                            | nd                                   | nd                                   |
| Galactose [g/100 g]     |    | 1.05 <sup>a</sup> ± 0.12 | 0.21 <sup>b</sup> ± 0.04      | 0.18 <sup>b</sup> ± 0.03             | 0.15 <sup>b</sup> ± 0.06             |

|                                   |                           |                           |                           |                           |
|-----------------------------------|---------------------------|---------------------------|---------------------------|---------------------------|
| Raffinose [g/100 g]               | nd                        | 0.09 <sup>a</sup> ± 0.007 | 0.04 <sup>b</sup> ± 0.008 | 0.03 <sup>b</sup> ± 0.002 |
| Stachyose [g/100 g]               | nd                        | 0.34 <sup>a</sup> ± 0.01  | 0.18 <sup>b</sup> ± 0.02  | 0.12 <sup>c</sup> ± 0.01  |
| Lactic acid [g/100 g]             | 0.60 <sup>a</sup> ± 0.01  | 0.55 <sup>b</sup> ± 0.02  | 0.53 <sup>b</sup> ± 0.01  | 0.55 <sup>b</sup> ± 0.01  |
| L-ascorbic acid [mg/100 g]        | 0.38 <sup>c</sup> ± 0.01  | 0.25 <sup>d</sup> ± 0.02  | 0.41 <sup>b</sup> ± 0.02  | 1.5 <sup>a</sup> ± 0.00   |
| L-dehydroascorbic acid [mg/100 g] | 0.02 <sup>b</sup> ± 0.001 | 0.01 <sup>c</sup> ± 0.00  | 0.03 <sup>a</sup> ± 0.001 | 0.03 <sup>a</sup> ± 0.002 |
| Protein content [%]               | 3.3 <sup>a</sup> ± 0.4    | 3.2 <sup>a</sup> ± 0.6    | 2.0 <sup>b</sup> ± 0.3    | 2.2 <sup>b</sup> ± 0.1    |
| Fat content [%]                   | 2.1 <sup>a</sup> ± 0.3    | 2.1 <sup>a</sup> ± 0.2    | 0.15 <sup>b</sup> ± 0.04  | 0.13 <sup>b</sup> ± 0.03  |

\* Data are expressed as mean ± standard deviation. nd – not detected, <sup>a-d</sup> - means in the same row followed by different lowercase represent the significant difference ( $p \leq 0.05$ )

Table S3. Physicochemical properties of fruit yogurts and plant-based yogurt alternatives directly after production\*.

| Parameters                   | Fruit preparation | Yogurts                  | Soy-based yogurt alternatives | White bean-based yogurt alternatives | Black bean-based yogurt alternatives |
|------------------------------|-------------------|--------------------------|-------------------------------|--------------------------------------|--------------------------------------|
| pH                           | Strawberry        | 4.15 <sup>a</sup> ± 0.2  | 4.23 <sup>a</sup> ± 0.3       | 4.25 <sup>a</sup> ± 0.3              | 4.19 <sup>a</sup> ± 0.3              |
|                              | Blueberry         | 4.17 <sup>a</sup> ± 0.2  | 4.25 <sup>a</sup> ± 0.3       | 4.26 <sup>a</sup> ± 0.2              | 4.19 <sup>a</sup> ± 0.2              |
| Titratable acidity [g/100 g] | Strawberry        | 0.64 <sup>a</sup> ± 0.04 | 0.59 <sup>a</sup> ± 0.02      | 0.60 <sup>a</sup> ± 0.02             | 0.61 <sup>a</sup> ± 0.02             |
|                              | Blueberry         | 0.66 <sup>a</sup> ± 0.06 | 0.60 <sup>a</sup> ± 0.01      | 0.58 <sup>a</sup> ± 0.02             | 0.63 <sup>a</sup> ± 0.05             |
| Fructose [g/100 g]           | Strawberry        | 2.49 <sup>a</sup> ± 0.2  | 2.46 <sup>a</sup> ± 0.5       | 2.48 <sup>a</sup> ± 0.3              | 2.46 <sup>a</sup> ± 0.1              |
|                              | Blueberry         | 3.55 <sup>a</sup> ± 0.1  | 3.59 <sup>a</sup> ± 0.2       | 3.58 <sup>a</sup> ± 0.0              | 3.60 <sup>a</sup> ± 0.2              |
| Glucose [g/100 g]            | Strawberry        | 2.89 <sup>a</sup> ± 0.1  | 2.41 <sup>b</sup> ± 0.0       | 2.40 <sup>b</sup> ± 0.2              | 2.39 <sup>b</sup> ± 0.0              |
|                              | Blueberry         | 3.59 <sup>a</sup> ± 0.1  | 3.40 <sup>b</sup> ± 0.0       | 3.41 <sup>b</sup> ± 0.1              | 3.39 <sup>b</sup> ± 0.2              |
| Sucrose [g/100 g]            | Strawberry        | 6.18 <sup>c</sup> ± 0.03 | 6.37 <sup>a</sup> ± 0.00      | 6.29 <sup>b</sup> ± 0.03             | 6.27 <sup>b</sup> ± 0.03             |
|                              | Blueberry         | 4.15 <sup>b</sup> ± 0.04 | 4.38 <sup>a</sup> ± 0.08      | 4.20 <sup>b</sup> ± 0.02             | 4.19 <sup>b</sup> ± 0.06             |
| Lactose [g/100 g]            | Strawberry        | 1.91 ± 0.04              | nd                            | nd                                   | nd                                   |
|                              | Blueberry         | 1.90 ± 0.08              | nd                            | nd                                   | nd                                   |
| Galactose [g/100 g]          | Strawberry        | 0.73 <sup>a</sup> ± 0.09 | 0.14 <sup>b</sup> ± 0.08      | 0.11 <sup>b</sup> ± 0.03             | 0.11 <sup>b</sup> ± 0.05             |
|                              | Blueberry         | 0.72 <sup>a</sup> ± 0.10 | 0.16 <sup>b</sup> ± 0.04      | 0.13 <sup>b</sup> ± 0.07             | 0.99 <sup>b</sup> ± 0.04             |
| Raffinose                    | Strawberry        | nd                       | 0.061 <sup>a</sup> ± 0.005    | 0.026 <sup>b</sup> ± 0.003           | 0.020 <sup>b</sup> ± 0.001           |

|                  |            |                           |                            |                            |                            |
|------------------|------------|---------------------------|----------------------------|----------------------------|----------------------------|
| [g/100 g]        | Blueberry  | nd                        | 0.063 <sup>a</sup> ± 0.004 | 0.026 <sup>b</sup> ± 0.005 | 0.019 <sup>b</sup> ± 0.006 |
| Stachyose        | Strawberry | nd                        | 0.23 <sup>a</sup> ± 0.02   | 0.12 <sup>b</sup> ± 0.01   | 0.08 <sup>c</sup> ± 0.01   |
| [g/100 g]        | Blueberry  | nd                        | 0.24 <sup>a</sup> ± 0.01   | 0.12 <sup>b</sup> ± 0.00   | 0.07 <sup>c</sup> ± 0.01   |
| Citric acid      | Strawberry | 0.15 <sup>a</sup> ± 0.04  | 0.14 <sup>a</sup> ± 0.05   | 0.14 <sup>a</sup> ± 0.03   | 0.16 <sup>a</sup> ± 0.08   |
| [g/100 g]        | Blueberry  | 0.21 <sup>a</sup> ± 0.06  | 0.19 <sup>a</sup> ± 0.05   | 0.19 <sup>a</sup> ± 0.05   | 0.19 <sup>a</sup> ± 0.08   |
| Lactic acid      | Strawberry | 0.42 <sup>a</sup> ± 0.00  | 0.37 <sup>b</sup> ± 0.01   | 0.36 <sup>b</sup> ± 0.02   | 0.36 <sup>b</sup> ± 0.00   |
| [g/100 g]        | Blueberry  | 0.43 <sup>a</sup> ± 0.01  | 0.36 <sup>b</sup> ± 0.01   | 0.35 <sup>b</sup> ± 0.02   | 0.34 <sup>b</sup> ± 0.02   |
| Malic acid       | Strawberry | 0.04 <sup>a</sup> ± 0.02  | 0.04 <sup>a</sup> ± 0.02   | 0.03 <sup>a</sup> ± 0.00   | 0.04 <sup>a</sup> ± 0.01   |
| [g/100 g]        | Blueberry  | 0.004 <sup>a</sup> ± 0.00 | 0.003 <sup>a</sup> ± 0.01  | 0.004 <sup>a</sup> ± 0.00  | 0.004 <sup>a</sup> ± 0.00  |
| Phenolic content | Strawberry | 35.9 <sup>c</sup> ± 1.5   | 55.5 <sup>a</sup> ± 1.0    | 42.1 <sup>b</sup> ± 1.2    | 54.5 <sup>a</sup> ± 1.1    |
| [mg/100 g]       | Blueberry  | 48.2 <sup>c</sup> ± 0.9   | 66.1 <sup>a</sup> ± 1.3    | 51.4 <sup>b</sup> ± 0.8    | 62.8 <sup>a</sup> ± 1.4    |

\* Data are expressed as mean ± standard deviation. nd – not detected, <sup>a-d</sup> - means in the same row followed by different lowercase represent the significant difference ( $p \leq 0.05$ ).

Table S4. The recipe for fruit preparations.

| Product                | Fruit preparation [1000 g] |           |                 |           |                        |            |
|------------------------|----------------------------|-----------|-----------------|-----------|------------------------|------------|
|                        | Fruit [g]                  | Sugar [g] | Citric acid [g] | Water [g] | Pectin preparation [g] | Starch [g] |
| Strawberry preparation | 600                        | 324       | 3               | 66        | 5                      | 2          |
| Blueberry preparation  | 600                        | 301       | 3.5             | 88.5      | 5                      | 2          |

Figure 1S. HPLC chromatogram of anthocyanin profile of strawberry (A) and blueberry (B) preparations.

**A**

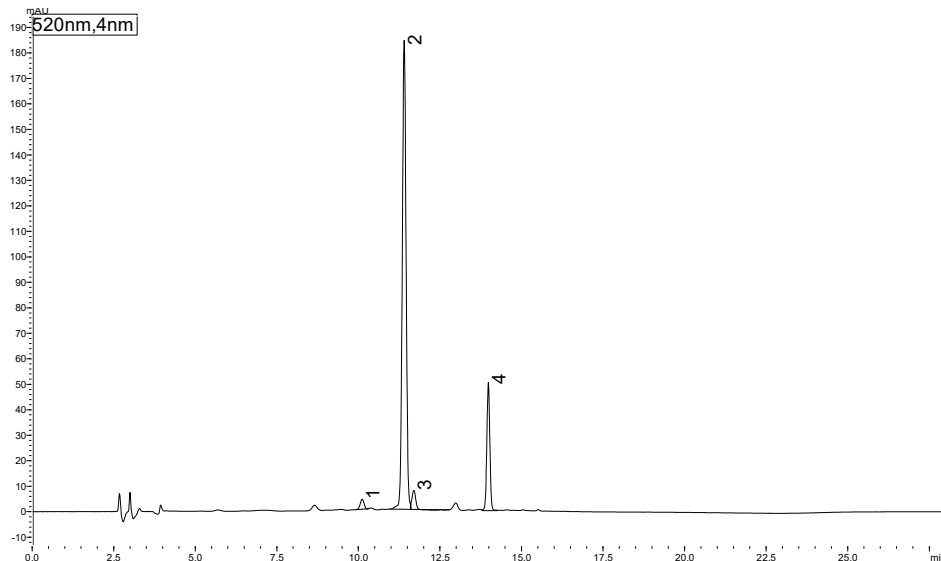

1. Cyanidin-3-*O*-glucoside, 2. Pelargonidin-3-*O*-glucoside, 3. Pelargonidin-3-*O*-rutinoside, 4. Pelargonidin 3-malonyl-glucoside.

**B**

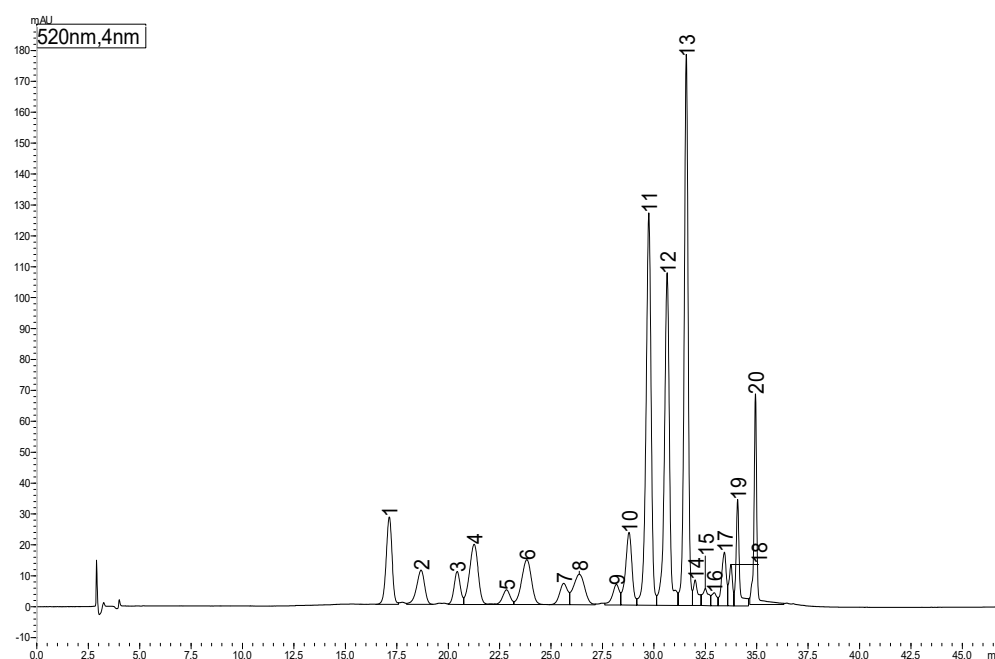

1. Delphinidin-3-*O*-galactoside, 2. Delphinidin-3-*O*-glucoside, 3. Cyanidin-3-*O*-galactoside, 4. Delphinidin-3-*O*-arabinoside, 5. Cyanidin-3-*O*-glucoside, 6. Petunidin-3-*O*-galactoside, 7. Cyanidin-3-*O*-arabinoside, 8. Petunidin-3-*O*-glucoside, 9. Peonidin-3-*O*-galactoside, 10. Petunidin-3-*O*-arabinoside, 11. Malvidin-3-*O*-galactoside, 12. Malvidin-3-*O*-glucoside, 13. Malvidin-3-*O*-arabinoside, 14-20 - Acylated anthocyanins.

Figure 2S. First-order degradation plots of total anthocyanins for strawberry (A) and blueberry (B) products storage during 8 weeks.

A

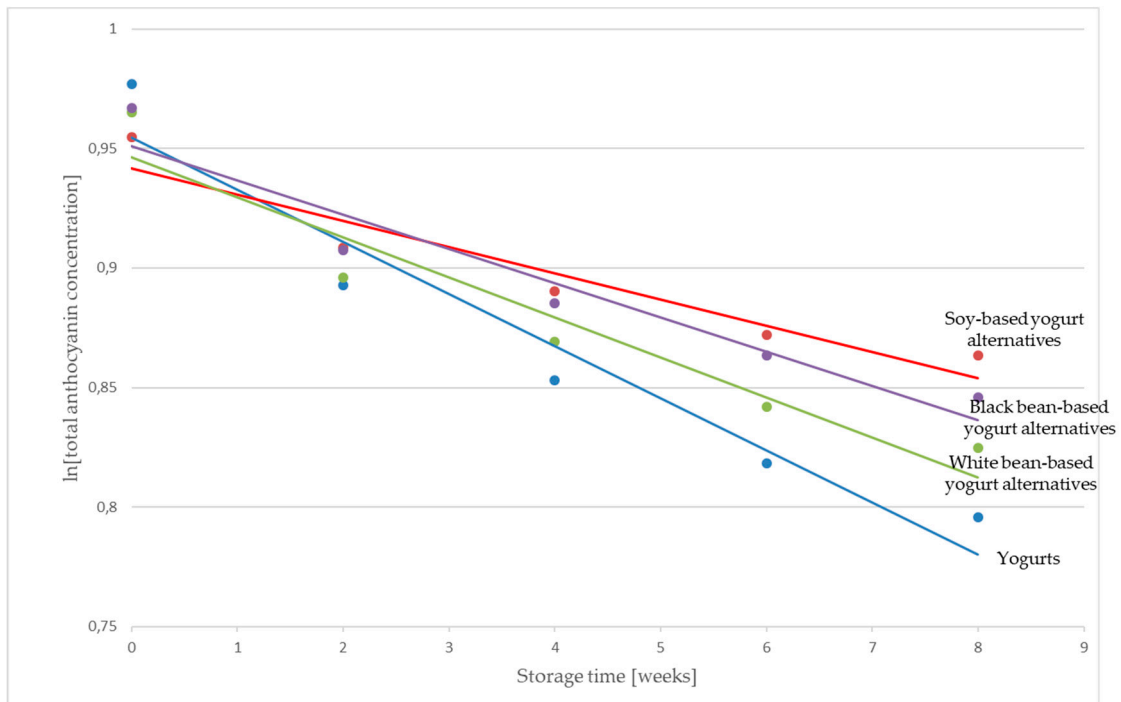

B

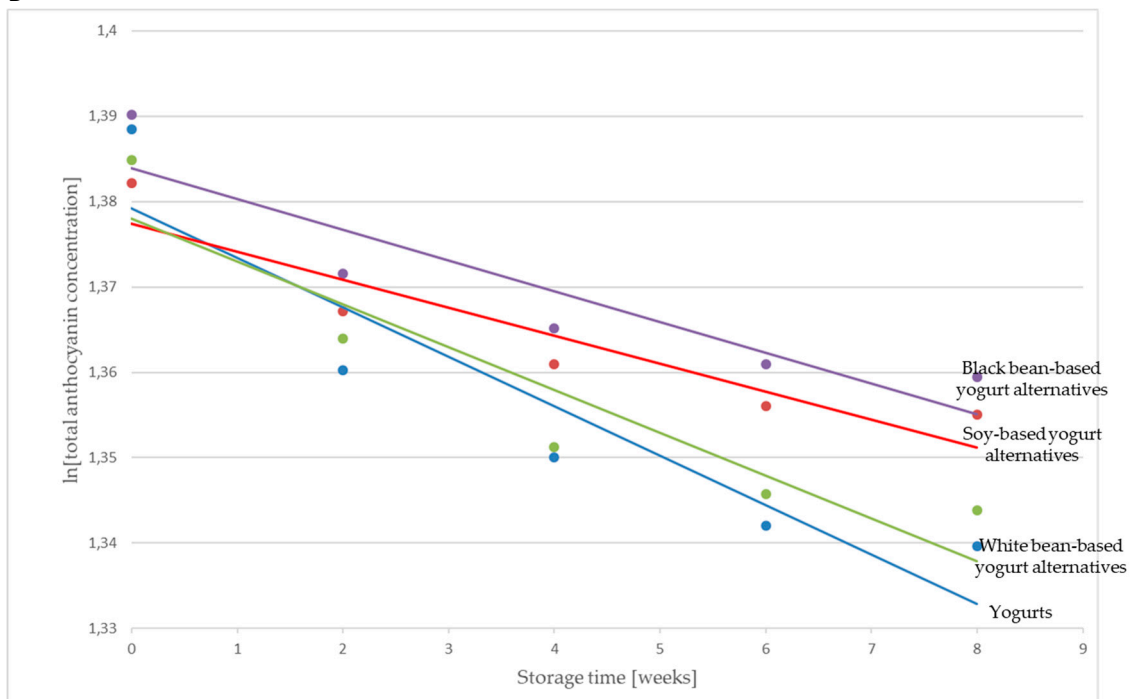

Supplement: s1 [file s1]
